# Supplementary material for: Genetic Analysis of the Full-Length gag Gene from the Earliest Korean Subclade B of HIV-1: An Outbreak among Korean Hemophiliacs
Source: MDPI journal article supplement (doi:10.3390/v11060545), 2019-06-11
Supplement: s1 [file s1]

| Position<br>Consensus | R07<br>TCA | 823<br>AAA | 940<br>TTA | 1012<br>CTT | 1151<br>GAC | 1264<br>ATA | 1281<br>TTC | 1674<br>GAC | 1707<br>GCC | 1722<br>CAG | 1887-9<br>GTA | 2155<br>ACA | 2190<br>GAA | No. PCR<br>amplicon | Date<br>sampled | Year of<br>diagnosis |
|-----------------------|------------|------------|------------|-------------|-------------|-------------|-------------|-------------|-------------|-------------|---------------|-------------|-------------|---------------------|-----------------|----------------------|
| DONOR 0               | G          |            |            |             |             |             | T           | T           | T           | A           | G             | T           | G           | 3                   | Oct 1991        | 1990                 |
| HP-1                  | G          |            |            |             |             |             | T           | T           | T           | A           | A             | T           | G           | 2                   | Feb 2001        | 1990                 |
| HP-2                  | G          |            |            |             |             |             | T           | T           | T           | A           | A             | T           | G           | 2                   | Aug 1991        | 1991                 |
| HP-3                  | G          |            |            |             |             |             | T           | T           | T           | A           | A             | T           | G           | 3                   | Jan 1992        | 1991                 |
| HP-4                  | G          |            |            |             |             |             | T           | T           | T           | A           | A             | T           | G           | 4                   | Aug 1992        | 1991                 |
| HP-6                  | G          |            |            |             |             |             | T           | T           | T           | A           | A             | T           | G           | 3                   | Oct 1993        | 1991                 |
| HP-8                  | G          |            |            |             |             |             | T           | T           | T           | A           | A             | T           | G           | 3                   | Oct 2002        | 1992                 |
| HP-10                 | G          |            |            |             |             |             | T           | T           | T           | A           | A             | T           | G           | 3                   | Sep 1992        | 1992                 |
| HP-18                 | G          |            |            |             |             |             | T           | T           | T           | A           | A             | T           | G           | 4                   | May 1992        | 1992                 |
|                       | G          |            |            |             |             |             | T           | T           | T           | A           | A             | T           | G           | 2                   | Aug 1992        | 1992                 |
|                       | G          |            |            |             |             |             | T           | T           | T           | A           | A             | T           | G           | 2                   | Apr 1993        | 1993                 |
|                       | G          |            |            |             |             |             | T           | T           | T           | A           | A             | T           | G           | 2                   | May 1993        | 1993                 |
| Cluster P (n=13)      |            |            |            |             |             |             |             |             |             |             |               |             |             |                     |                 |                      |
| DONOR P               | G          | C          | A          |             | G           | G           |             |             |             |             |               |             |             | 5                   | Oct 1993        | 1991                 |
| HP-5                  | G          |            |            |             | G           | G           |             |             |             |             |               |             |             | 3                   | Aug 1993        | 1992                 |
| HP-7                  | G          | C          | A          |             | G           | G           |             |             |             |             |               |             |             | 2                   | Aug 1993        | 1992                 |
| HP-9                  | G          | C          | A          |             | G           | G           |             |             |             |             |               |             |             | 4                   | Jun 1995        | 1992                 |
| HP-11                 | G          | C          | A          |             | G           | G           |             |             |             |             |               | T           | G           | 2                   | Jul 1992        | 1992                 |
| HP-12                 | G          | C          | A          |             | G           | G           |             |             |             |             |               |             |             | 2                   | Dec 2002        | 1992                 |
| HP-13                 | G          | C          | A          |             | G           | G           |             |             |             |             |               |             |             | 2                   | Jul 1992        | 1992                 |
| HP-14                 | G          | C          | A          |             | G           | G           |             |             |             |             |               |             |             | 2                   | May 1992        | 1992                 |
| HP-15                 | G          | C          | A          |             | G           | G           |             |             |             |             |               |             |             | 3                   | Jul 1992        | 1992                 |
| HP-16                 | G          | C          | A          |             | G           | G           |             |             |             |             |               |             |             | 3                   | Mar 1992        | 1992                 |
| HP-17                 | G          | C          | A          |             | G           | G           |             |             |             |             |               |             |             | 3                   | Mar 2003        | 1992                 |
| HP-19                 | G          | C          | A          |             | G           | G           |             |             |             |             |               |             |             | 2                   | Oct 2013        | 1992                 |
| HP-20                 | G          | C          | A          |             | G           | G           |             |             |             |             |               |             |             | 2                   | Dec 1992        | 1992                 |
|                       | G          | C          | A          |             | G           | G           |             |             |             |             |               |             |             | 2                   | Mar 1993        | 1993                 |
|                       | G          | C          | A          |             | G           | G           |             |             |             |             |               |             |             | 2                   | Nov 2002        | 1993                 |
|                       | G          | C          | A          |             | G           | G           |             |             |             |             |               |             |             | 2                   | Nov 2002        | 1993                 |
|                       | G          | C          | A          |             | G           | G           |             |             |             |             |               |             |             | 2                   | Oct 2002        | 1994                 |
| Local controls (n=72) |            |            |            |             |             |             |             |             |             |             |               |             |             |                     |                 |                      |
| 92HCS10               |            |            |            | A           | G           |             |             |             |             |             |               |             |             | 4                   | Oct 1992        | 1989                 |
| 95HSH5                |            |            |            |             | G           |             |             |             |             |             |               |             |             | 2                   | May 1995        | 1989                 |
| 92LSW5                | G          |            |            |             | G           |             |             |             |             |             |               |             |             | 2                   | May 1992        | 1989                 |
| 921SY12               |            |            |            |             |             |             | T           | T           |             | A           |               |             |             | 2                   | Oct 1992        | 1989                 |
| 02LJ18                |            |            |            |             | G           |             | T           |             | T           |             |               |             |             | 3                   | Aug 2002        | 1989                 |
| 93PJ49                |            |            |            |             | G           |             |             |             |             |             | C             |             |             | 3                   | Oct 1993        | 1989                 |
| 91KJS12               | G          |            |            |             | G           |             |             |             |             |             | C             |             |             | 5                   | Dec 1991        | 1989                 |
| 94KYJ12               |            |            |            |             | G           |             | T           |             | T           |             |               |             |             | 2                   | Dec 1994        | 1989                 |
| 93KHS5                |            |            |            |             | G           |             | T           |             |             |             |               |             |             | 2                   | May 1993        | 1989                 |
| 93HYH5                |            |            |            |             |             |             |             |             |             |             | C             |             |             | 2                   | May 1993        | 1989                 |
| 93BJR3                |            |            |            |             |             |             |             |             |             |             |               |             |             | 2                   | Mar 1993        | 1989                 |
| 93AJE5                |            |            |            |             |             |             |             |             |             |             |               |             |             | 2                   | May 1993        | 1990                 |
| 93LSK4                |            |            |            |             |             |             |             |             |             |             |               |             |             | 2                   | Mar 1993        | 1990                 |
| 92KChS3               |            | G          |            | A           | G           |             |             |             |             |             |               |             |             | 2                   | Mar 1992        | 1990                 |
| 91YWS12               |            |            | C          | A           | G           |             |             |             |             |             |               |             |             | 2                   | Dec 1991        | 1990                 |
| 92LSH6                |            | G          |            |             | G           |             |             |             |             |             |               |             |             | 5                   | Jun 1992        | 1990                 |
| 95KHB7                |            |            |            | A           | G           |             |             |             |             |             |               |             |             | 2                   | May 1994        | 1990                 |
| 92KDG4                |            |            |            |             | G           |             |             |             |             |             | T             |             |             | 2                   | Apr 1992        | 1990                 |
| 93JJS10               |            |            |            |             | G           |             |             |             |             |             |               |             |             | 2                   | Oct 1993        | 1990                 |
| 92KJH11               |            |            |            | A           | G           |             |             |             |             |             |               |             |             | 2                   | Nov 1992        | 1990                 |
| 92HSM8                |            |            |            |             | G           |             |             |             |             |             |               |             |             | 2                   | Aug 1992        | 1990                 |
| 93YEH1                |            |            |            |             |             |             |             |             |             |             |               |             |             | 2                   | Jan 1993        | 1990                 |
| 03YCS3                |            |            |            |             |             |             |             |             |             |             |               |             |             | 2                   | Mar 2003        | 1990                 |
| 01KJin7               |            |            |            |             | G           |             |             |             |             |             | T             |             |             | 2                   | Jul 2001        | 1990                 |
| 910CH6                |            |            |            |             |             |             |             |             |             |             |               |             |             | 2                   | Aug 1992        | 1990                 |
| 921CS3                |            |            |            | A           | G           |             |             |             |             |             |               |             |             | 2                   | Mar 1992        | 1991                 |
| 92DGI6                |            |            |            |             | G           |             |             |             |             |             |               |             |             | 2                   | Jun 1992        | 1991                 |
| 92PJ86                |            |            |            |             | A           |             | T           |             |             |             |               |             |             | 2                   | Jun 1992        | 1991                 |
| 92JWK3                |            |            |            |             |             |             |             |             |             |             | T             |             |             | 2                   | Jun 1992        | 1991                 |
| 92JHJ7                |            |            |            |             | G           |             |             |             |             |             | T             |             |             | 2                   | Mar 1992        | 1991                 |
| 99KGS8                |            |            |            |             |             |             |             |             |             |             | T             |             |             | 2                   | Jul 1991        | 1991                 |
| 96SN55                |            |            |            |             | G           |             |             |             |             | A           |               |             |             | 2                   | Aug 1999        | 1991                 |
| 92KYB10               |            |            |            |             |             |             |             |             |             |             |               |             |             | 2                   | May 1996        | 1991                 |
| 92HJH10               |            |            |            |             |             |             |             |             |             |             |               |             |             | 2                   | Oct 1992        | 1991                 |
| 92KSS12               |            | G          |            | A           | G           |             |             |             |             |             | C             |             |             | 2                   | Oct 1992        | 1991                 |
| 93JSH3                |            |            |            |             | G           |             |             |             |             |             |               |             |             | 2                   | Dec 1992        | 1992                 |
| 92PGJ4                |            |            |            | A           | G           |             |             | T           |             |             |               |             |             | 2                   | Mar 1993        | 1992                 |
| 92JY012               |            |            |            |             | G           |             |             |             |             |             |               |             |             | 2                   | Apr 1992        | 1992                 |
| 92CYK6                |            |            |            |             | G           |             | T           |             |             |             |               |             |             | 2                   | Dec 1992        | 1992                 |
| 92KJS12               |            |            |            |             |             |             |             |             |             |             |               |             |             | 2                   | Jun 1992        | 1992                 |
| 93KYY2                |            |            |            |             |             |             |             |             |             |             |               |             |             | 2                   | Dec 1992        | 1992                 |
| 92BSJn9               |            |            |            | A           |             |             | A           |             |             |             | C             |             |             | 4                   | Feb 1993        | 1992                 |
| 92LKH10               |            | G          |            | C           | A           |             | G           |             |             |             |               |             |             | 2                   | Jun 1992        | 1992                 |
| 92KJnSo10             |            |            |            |             | G           |             | G           |             |             |             |               |             |             | 2                   | Oct 1992        | 1992                 |
| 94KJH10               |            |            |            |             |             |             |             |             |             |             |               |             |             | 2                   | Oct 1994        | 1992                 |
| 92CNS5                |            |            |            |             | G           |             | T           |             |             |             |               |             |             | 2                   | May 1992        | 1992                 |
| 93KJGn9               |            |            |            |             | G           |             | T           |             |             |             |               |             |             | 2                   | Sep 1993        | 1993                 |
| 92KCS6                |            |            |            |             | G           |             |             |             |             |             |               |             |             | 2                   | Jun 1992        | 1992                 |
| 92KJK10               |            |            |            |             |             |             |             |             |             |             |               |             |             | 2                   | Oct 1992        | 1992                 |
| 93KYS12               |            |            |            |             | G           |             |             |             |             |             |               |             |             | 2                   | Dec 1993        | 1992                 |
| 92CIS6                |            |            |            |             |             |             |             |             |             |             |               |             |             | 2                   | Jun 1992        | 1992                 |
| 93PCKy3               |            |            |            |             |             |             |             |             |             |             |               |             |             | 6                   | Mar 1993        | 1992                 |
| 93KYR2                |            |            |            |             | G           |             | T           |             |             |             |               |             |             | 2                   | Feb 1993        | 1993                 |
| 93LJS62               |            |            |            |             | G           |             |             |             |             |             | T             |             |             | 2                   | Feb 1993        | 1993                 |
| 93CHM2                |            |            |            |             | G           |             |             |             |             |             |               |             |             | 2                   | Feb 1993        | 1993                 |
| 94CDH9                | G          |            |            |             | G           |             |             |             |             |             |               |             |             | 2                   | Sep 1993        | 1993                 |
| 95KJHw4               |            |            |            |             | G           |             |             |             |             |             |               |             |             | 2                   | Apr 1995        | 1993                 |
| 94CYIk8               |            | G          |            |             | G           |             |             |             |             |             |               |             |             | 2                   | Aug 1994        | 1993                 |
| 04KMH5                |            |            |            |             | G           |             |             |             |             |             | C             |             |             | 2                   | May 2004        | 1993                 |
| 04LSH10               |            |            |            |             |             |             | T           |             |             |             | C             |             |             | 2                   | Oct 2004        | 1994                 |
| 99HGH5                |            |            |            |             | G           |             |             |             |             |             |               |             |             | 2                   | May 1999        | 1994                 |
| 06YJN7                |            |            |            |             | G           |             |             |             |             |             |               |             |             | 3                   | Jul 2006        | 1996                 |
| 01PSJ12               |            |            |            |             | G           |             | T           |             |             |             |               |             |             | 3                   | Dec 2001        | 2001                 |
| 05JJI1                |            |            |            |             |             |             |             |             |             |             |               |             |             | 8                   | Jan 2005        | 2001                 |
| 01LHS2                |            | G          |            |             |             |             |             |             |             |             |               |             |             | 2                   | Feb 2001        | 2001                 |
| 04KKT7                |            | G          |            | C           | A           |             |             |             |             | A           | A             | G           |             | 2                   | Jul 2004        | 2004                 |
| 05KBH5                |            |            |            |             |             |             | T           |             | T           |             |               | T           |             | 2                   | May 2005        | 2004                 |
| 05CYG51               |            |            |            |             |             |             | T           |             | T           |             | A             |             |             | 2                   | Jan 2005        | 2004                 |
| 05KJM2                |            |            |            |             |             |             |             |             |             |             | A             |             |             | 2                   | Feb 2005        | 2004                 |
| 05KMS2                |            |            |            |             |             |             |             |             |             |             |               |             |             | 2                   | Feb 2005        | 2004                 |
| 11JGB7                |            |            |            |             |             |             |             |             |             |             | C             |             |             | 3                   | Jul 2011        | 2011                 |
| 13PJH6                |            |            |            |             |             |             | T           |             |             |             |               | T           |             | 2                   | Jun 2013        | 2013                 |

| Subtype B (n=16) |     |     |     |      |      |      |      |      |      |      |        |           |
|------------------|-----|-----|-----|------|------|------|------|------|------|------|--------|-----------|
| 02CSR9           | ... | C.  | ... | ...  | ...  | G.   | ...  | T    | ...  | ...  | ...    | ..G       |
| 12CSR12          | ... | C.  | ... | ...  | ...  | G.   | ...  | T    | ...  | ...  | ...    | ..G       |
| 01HSJ4           | ... | C.  | ... | ...  | ...  | G.   | ...  | T    | ...  | ...  | ...    | ..G       |
| 96HHP5           | ... | C.  | ... | ...  | ...  | G.   | ...  | T    | ...  | ...  | ...    | ..G       |
| 04LJH7           | ... | C.  | ... | ...  | ...  | G.   | ...  | T    | ...  | ...  | ...    | ..G       |
| 93KNY12          | ... | C.  | ... | ...  | ...  | G.   | ...  | T    | ...  | ...  | ...    | ..G       |
| 95LH010          | ... | C.  | ... | ...  | ...  | G.   | ...  | T    | ...  | ...  | ...    | ..G       |
| 91HJH12          | ... | C.  | ... | ...  | ...  | G.   | ...  | T    | ...  | ...  | ...    | ..G       |
| 910JSb6          | ... | C.  | ... | ...  | ...  | G.   | ...  | T    | ...  | ...  | ...    | ..G       |
| 95J0E10          | ... | C.  | ... | ...  | ...  | G.   | ...  | T    | ...  | ...  | ...    | ..G       |
| 05J0E1           | ... | C.  | ... | ...  | ...  | G.   | ...  | T    | ...  | ...  | ...    | ..G       |
| 97PKA7           | ... | C.  | ... | ...  | ...  | G.   | ...  | T    | ...  | ...  | ...    | ..G       |
| 93JDK4           | ... | C.  | ... | ...  | ...  | G.   | ...  | T    | ...  | ...  | ...    | ..G       |
| 97PJH4           | ... | C.  | ... | ...  | ...  | G.   | ...  | T    | ...  | ...  | ...    | ..G       |
| 92SY11           | ... | C.  | ... | ...  | ...  | G.   | ...  | T    | ...  | ...  | ...    | ..G       |
| 97SY14           | ... | C.  | ... | ...  | ...  | G.   | ...  | T    | ...  | ...  | ...    | ..G       |
| 93YEJ2           | ... | C.  | ... | ...  | ...  | G.   | ...  | T    | ...  | ...  | ...    | ..G       |
| 99SKC1           | ... | C.  | ... | ...  | ...  | G.   | ...  | T    | ...  | ...  | ...    | ..G       |
| 99HYJ5           | ... | C.  | ... | ...  | ...  | G.   | ...  | T    | ...  | ...  | ...    | ..G       |
| HXB2             | ... | C.  | ... | ...  | ...  | G.   | ...  | T    | ...  | ...  | ...    | ..G       |
| Consensus        | TCA | AAA | TTA | CTT  | GAC  | ATA  | TTC  | GAC  | GCC  | CAG  | GTA    | ACA GAA   |
|                  | 807 | 823 | 940 | 1012 | 1151 | 1264 | 1281 | 1674 | 1707 | 1722 | 1897-9 | 2155 2190 |

Sep 2002 1987  
 Apr 2001 1987  
 May 1996 1991  
 Jul 2004 1994  
 Dec 1993 1987  
 Oct 1995 1987  
 Dec 1991 1987  
 Jun 1991 1988  
 Oct 1995 1988  
 Jul 1997 1988  
 Apr 1993 1989  
 Apr 1997 1990  
 Jan 1992 1990  
 Apr 1997 1990  
 Feb 1993 1990  
 Jan 1999 1990  
 May 1999 1990  
 K03455

Figure S1: Alignment of 14 signature pattern nucleotides in the 94 patients infected with the Korean subclade of HIV-1 subtype B. Specific nucleotides at positions 9 and 2 were detected in 100% of cases in clusters O and P, respectively, although this high prevalence was not present in the LCs. There was no nucleotide A at position 1897 in three PCR amplicons from HP-6. This difference between clusters O (nine positions) and P (five positions) resulted in a difference in the strength of clustering in clusters O and P. The dot and hyphen indicate the same sequence and deletion compared with consensus sequences, respectively. The nucleotide positions on the uppermost line are based on HIV-1 HXB2 (K03455). Lowercase letters indicated a mixed type with consensus sequences.
